# Supplementary material for: Skipping breakfast among 8-9 year old children is associated with teacher-reported but not objectively measured academic performance two years later
Source: PubMed Central journal article supplement (PMC7050735; doi:10.1186/s40795-017-0205-8), 2017-12-06
Supplement: 40795_2017_205_MOESM1_ESM.pdf [file 40795_2017_205_MOESM1_ESM.pdf]

**Skipping breakfast among 8-9 year old children is associated with teacher-reported but not objectively measured academic performance two years later**

Figure S1. Time line showing the data collection periods for the Longitudinal Study of Australian children

Table S1. Differences between children who were included and excluded from the analyses (N=4,331)

Table S2. Cross-sectional associations between skipping breakfast aged 8-9 years and teacher-reported academic performance aged 8-9 years (N=2056)

Table S3. Cross-sectional associations between skipping breakfast aged 8-9 years and teacher-reported behavior aged 8-9 years (N=2054)

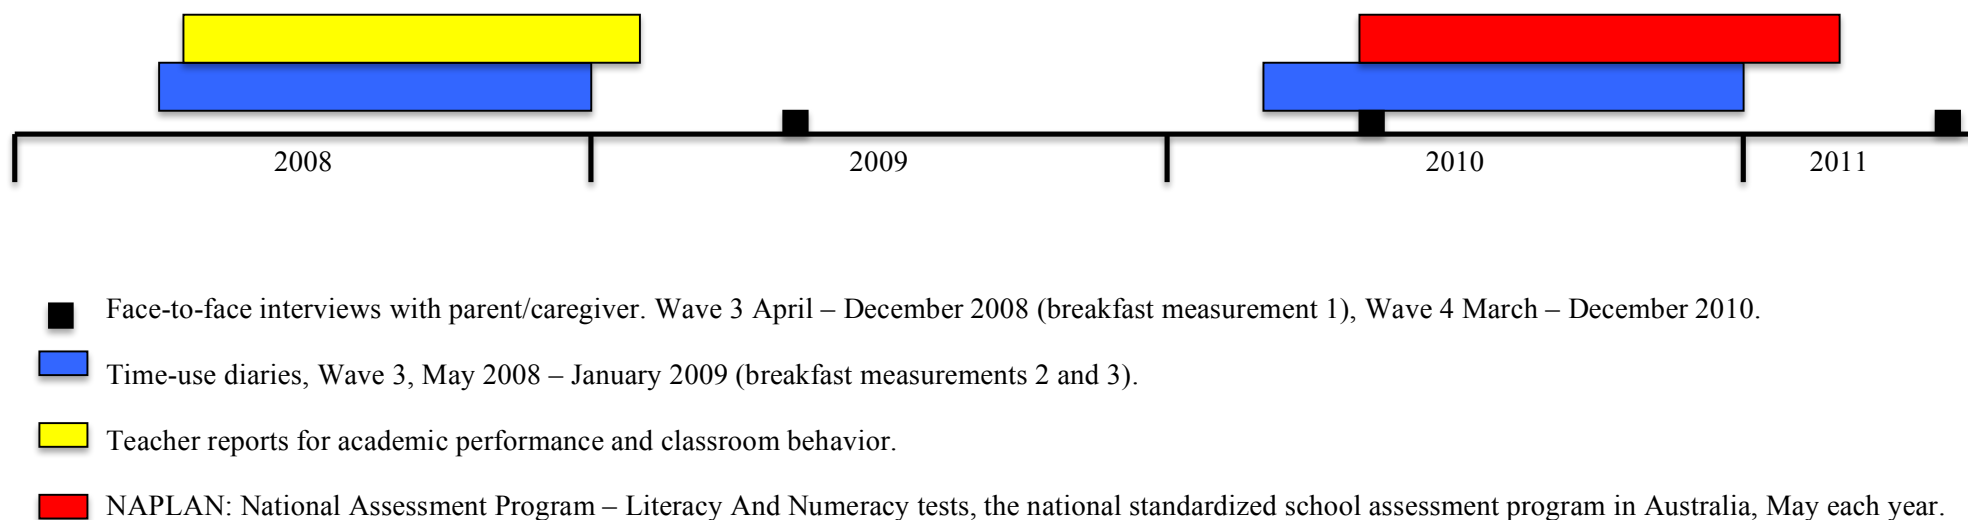

**Figure S1. Time line showing the data collection periods for the Longitudinal Study of Australian children**

**Table S1. Differences between children who were included and excluded from the analyses (N=4,331)**

| Characteristic                                | Included (n=2,280)<br><i>n</i> (%) or mean $\pm$ SD | Excluded (n=2,052)<br><i>n</i> (%) or mean $\pm$ SD |
|-----------------------------------------------|-----------------------------------------------------|-----------------------------------------------------|
| Child's sex                                   |                                                     |                                                     |
| Boy                                           | 1181 (51.8)                                         | 1032 (50.3)                                         |
| Girl                                          | 1099 (48.2)                                         | 1020 (49.7)                                         |
| Breakfast at interview (N=4,331) <sup>1</sup> |                                                     |                                                     |
| Ate breakfast                                 | 2216 (97.2)                                         | 1903 (92.8)                                         |
| Skipped                                       | 64 (2.8)                                            | 137 (6.7)                                           |
| Don't know                                    | 0 (0)                                               | 11 (0.5)                                            |
| <b>Aged 8-9 years</b>                         |                                                     |                                                     |
| Socio-economic status                         |                                                     |                                                     |
| Most disadvantaged SES quartile               | 455 (20.0)                                          | 667 (32.6)                                          |
| Least disadvantaged SES quartile              | 460 (20.2)                                          | 223 (10.9)                                          |
| <i>Teacher-reported:</i>                      |                                                     |                                                     |
| Reading progress (N=3,578)                    |                                                     |                                                     |
| Far above/above average                       | 825 (42.4)                                          | 516 (31.6)                                          |
| Average                                       | 803 (41.2)                                          | 675 (41.4)                                          |
| Far below/below average                       | 319 (16.4)                                          | 440 (27.0)                                          |
| Mathematics progress (N=3,560)                |                                                     |                                                     |
| Far above/above average                       | 785 (40.6)                                          | 482 (29.7)                                          |
| Average                                       | 884 (45.7)                                          | 788 (48.5)                                          |
| Far below/below average                       | 266 (13.8)                                          | 355 (21.9)                                          |
| Overall achievement (N=3,547)                 |                                                     |                                                     |
| Far above/above average                       | 786 (40.7)                                          | 474 (29.3)                                          |
| Average                                       | 911 (47.2)                                          | 790 (48.9)                                          |
| Far below/below average                       | 233 (12.1)                                          | 353 (21.8)                                          |
| Behavior <sup>2</sup>                         |                                                     |                                                     |
| Internalizing problems (N=3,582)              | 2.34 $\pm$ 2.83                                     | 2.89 $\pm$ 3.29                                     |
| Externalizing problems (N=3,585)              | 3.15 $\pm$ 3.62                                     | 4.15 $\pm$ 4.10                                     |
| Prosocial behavior (N=3,583)                  | 7.75 $\pm$ 2.21                                     | 7.47 $\pm$ 2.33                                     |
| Year 3 NAPLAN <sup>3</sup> results            |                                                     |                                                     |
| Reading (N=2,930)                             | 437.6 $\pm$ 83.2                                    | 410.4 $\pm$ 83.5                                    |
| Writing (N=2,931)                             | 438.2 $\pm$ 73.4                                    | 419.9 $\pm$ 73.6                                    |
| Spelling (N=2,933)                            | 426.6 $\pm$ 75.0                                    | 409.0 $\pm$ 78.2                                    |
| Grammar (N=2,930)                             | 444.5 $\pm$ 86.0                                    | 416.4 $\pm$ 87.3                                    |
| Numeracy (N=2,929)                            | 430.3 $\pm$ 70.6                                    | 408.4 $\pm$ 70.4                                    |
| <b>Aged 10-11 years</b>                       |                                                     |                                                     |
| Teacher-reported                              |                                                     |                                                     |
| Reading progress (N=3,240)                    |                                                     |                                                     |
| Far above/above average                       | 837 (43.7)                                          | 437 (33.0)                                          |
| Average                                       | 785 (41.0)                                          | 589 (44.5)                                          |
| Far below/below average                       | 293 (15.3)                                          | 299 (22.6)                                          |
| Mathematics progress (N=3,209)                |                                                     |                                                     |
| Far above/above average                       | 784 (41.3)                                          | 390 (29.8)                                          |

|                                    |              |              |
|------------------------------------|--------------|--------------|
| Average                            | 836 (44.0)   | 614 (46.9)   |
| Far below/below average            | 279 (14.7)   | 306 (23.4)   |
| Overall achievement (N=3,227)      |              |              |
| Far above/above average            | 812 (42.6)   | 410 (31.1)   |
| Average                            | 870 (45.6)   | 653 (49.5)   |
| Far below/below average            | 226 (11.8)   | 256 (19.4)   |
| Behavior <sup>2</sup>              |              |              |
| Internalizing problems (N=3,268)   | 2.29 ± 2.97  | 2.51 ± 3.02  |
| Externalizing problems (N=3,267)   | 2.88 ± 3.54  | 3.55 ± 3.87  |
| Prosocial behavior (N=3,268)       | 7.93 ± 2.20  | 7.72 ± 2.18  |
| Year 5 NAPLAN <sup>3</sup> results |              |              |
| Reading (N=3,841)                  | 518.7 ± 79.7 | 492.0 ± 82.9 |
| Writing (N=3,828)                  | 501.8 ± 68.6 | 485.9 ± 71.0 |
| Spelling (N=3,835)                 | 501.8 ± 66.2 | 485.3 ± 72.9 |
| Grammar (N=3,835)                  | 527.7 ± 80.9 | 501.6 ± 88.3 |
| Numeracy (N=3,820)                 | 512.1 ± 72.1 | 489.7 ± 73.3 |

<sup>2</sup>NAPLAN, National Assessment Program – Literacy And Numeracy.

<sup>1</sup>Breakfast consumption reported by the parent/caregiver at the face-to-face interview was assessed using the question “Did <study child> eat breakfast today?”. This measure of breakfast consumption was used for this analysis as nearly all participants (those included and excluded from the main analysis) had data for this question.

<sup>2</sup> Values are the unadjusted mean ± SD score for the three scales of the Strengths and Difficulties Questionnaire. Better behavior is indicated by lower scores for internalizing problems (range 0 – 18) and externalizing problems (range 0 – 20) and higher scores for prosocial behavior (range 0 – 10).

<sup>3</sup> Values are the unadjusted mean ± SD for each domain of the NAPLAN assessments. Possible score range 0-1,000, higher scores indicate better academic performance.

**Table S2. Cross-sectional associations between skipping breakfast aged 8-9 years and teacher-reported academic performance aged 8-9 years (N=1,953)**

| <b>Outcome and category of skipping breakfast</b> | <b>Above average<sup>1</sup></b><br><i>n</i> (%) | <b>Average<sup>1</sup></b><br><i>n</i> (%) | <b>Below average<sup>1</sup></b><br><i>n</i> (%) | <b>Model 1<sup>2</sup></b><br>PR (95% CI) | <b>Model 2<sup>3</sup></b><br>PR (95% CI) | <b>Model 3<sup>4</sup></b><br>PR (95% CI) |
|---------------------------------------------------|--------------------------------------------------|--------------------------------------------|--------------------------------------------------|-------------------------------------------|-------------------------------------------|-------------------------------------------|
| <b>Reading progress</b>                           |                                                  |                                            |                                                  |                                           |                                           |                                           |
| Never skipped                                     | 742 (42.7)                                       | 716 (41.2)                                 | 218 (16.2)                                       | 1.00 (ref)                                | 1.00 (ref)                                | 1.00 (ref)                                |
| ≥1 skips                                          | 83 (39.9)                                        | 87 (41.8)                                  | 38 (18.3)                                        | 1.08 (0.98, 1.20)                         | 1.08 (0.98, 1.19)                         | 1.05 (0.96, 1.15)                         |
| <i>P</i> -value                                   |                                                  |                                            |                                                  | 0.10                                      | 0.10                                      | 0.25                                      |
| <b>Mathematics progress</b>                       |                                                  |                                            |                                                  |                                           |                                           |                                           |
| Never skipped                                     | 699 (40.6)                                       | 783 (45.4)                                 | 242 (14.0)                                       | 1.00 (ref)                                | 1.00 (ref)                                | 1.00 (ref)                                |
| ≥1 skips                                          | 84 (40.6)                                        | 99 (47.8)                                  | 24 (12.0)                                        | 1.03 (0.93, 1.14)                         | 1.04 (0.94, 1.15)                         | 1.04 (0.94, 1.15)                         |
| <i>P</i> -value                                   |                                                  |                                            |                                                  | 0.54                                      | 0.44                                      | 0.41                                      |
| <b>Overall achievement</b>                        |                                                  |                                            |                                                  |                                           |                                           |                                           |
| Never skipped                                     | 696 (40.6)                                       | 810 (47.3)                                 | 208 (12.1)                                       | 1.00 (ref)                                | 1.00 (ref)                                | 1.00 (ref)                                |
| ≥1 skips                                          | 83 (40.9)                                        | 97 (47.8)                                  | 23 (11.3)                                        | 1.05 (0.95, 1.17)                         | 1.05 (0.95, 1.17)                         | 1.04 (0.94, 1.14)                         |
| <i>P</i> -value                                   |                                                  |                                            |                                                  | 0.33                                      | 0.32                                      | 0.46                                      |

<sup>1</sup> Comparisons are to other children of the same grade level. Below average = below/far below average; Above average = above/far above average.

<sup>2</sup> Model 1: adjusted for sex and age at time of the parent interview.

<sup>3</sup> Model 2: adjusted for sex, age at time of the parent interview and SES (measured at Wave 3).

<sup>4</sup> Model 3: Model 2 plus the following additional covariates *reading progress* – smoking status of primary caregiver; *mathematics progress* – financial hardship, two-parent home, teacher reported pro-social behavior; *overall achievement* – financial hardship, two-parent home, smoking status of primary caregiver, self-reported health of primary caregiver, teacher reported prosocial behavior.

**Table S3. Cross-sectional associations between skipping breakfast aged 8-9 years and teacher-reported behavior aged 8-9 years (N=1952)**

| Behavior subscale and category of skipping breakfast | n    | Mean ± SD <sup>1</sup> | Model 1 <sup>2</sup>       | Model 2 <sup>3</sup>       | Model 3 <sup>4</sup>       |
|------------------------------------------------------|------|------------------------|----------------------------|----------------------------|----------------------------|
|                                                      |      |                        | Diff (95% CI) <sup>5</sup> | Diff (95% CI) <sup>5</sup> | Diff (95% CI) <sup>5</sup> |
| Internalizing problems                               |      |                        |                            |                            |                            |
| Never skipped                                        | 1726 | 2.47 ± 3.28            | 0 (ref)                    | 0 (ref)                    | 0 (ref)                    |
| ≥1 skips                                             | 206  | 2.86 ± 4.41            | 0.10 (-0.47, 0.67)         | 0.04 (-0.50, 0.57)         | 0.13 (-0.65, 0.38)         |
| P-value                                              |      |                        | 0.73                       | 0.90                       | 0.61                       |
| Externalizing problems                               |      |                        |                            |                            |                            |
| Never skipped                                        | 1726 | 3.47 ± 4.42            | 0 (ref)                    | 0 (ref)                    | 0 (ref)                    |
| ≥1 skips                                             | 206  | 3.75 ± 5.00            | 0.24 (-1.75, 2.23)         | -0.16 (-1.92, 1.60)        | -0.89 (-2.48, 0.69)        |
| P-value                                              |      |                        | 0.81                       | 0.86                       | 0.24                       |
| Prosocial behavior                                   |      |                        |                            |                            |                            |
| Never skipped                                        | 1743 | 7.66 ± 2.44            | 0 (ref)                    | 0 (ref)                    | ---- <sup>6</sup>          |
| ≥1 skips                                             | 209  | 7.37 ± 2.47            | -0.21 (-0.46, 0.04)        | -0.17 (-0.41, 0.07)        | ---- <sup>6</sup>          |
| P-value                                              |      |                        | 0.10                       | 0.16                       |                            |

<sup>1</sup> Values are the unadjusted mean ± SD score for the three scales of the Strengths and Difficulties Questionnaire. Better behavior is indicated by lower scores for internalizing problems (range 0 – 18) and externalizing problems (range 0 – 20) and higher scores for prosocial behavior (range 0 – 10).

<sup>2</sup> Model 1: adjusted for sex and age at interview.

<sup>3</sup> Model 2: adjusted for sex, age at interview and SES (measured at Wave 3)

<sup>4</sup> Model 3: Model 2 plus additional adjustments for *internalizing problems* – two-parent home, financial hardship, self-reported health of primary caregiver, reading progress; *externalizing problems* – two-parent home, financial hardship, self-reported health of primary caregiver, reading progress.

<sup>5</sup> Differences between breakfast skippers and breakfast eaters were calculated using linear regression.

<sup>6</sup> There was no model 3 for prosocial behavior as none of the additional covariates changed the coefficient of the covariate for skipping breakfast by at least 10%.
